# Supplementary material for: Structure and ligand binding of As-p18, an extracellular fatty acid binding protein from the eggs of a parasitic nematode
Source: PubMed Central journal article supplement (PMC6646235; doi:10.1042/bsr20191292), 2019-07-23
Supplement: bsr20191292_Supp1.pdf [file bsr20191292_Supp1.pdf]

## **Asp-18, an extracellular fatty acid binding protein of nematodes, exhibits unusual structural features**

Marina IBÁÑEZ-SHIMABUKURO\*, M. Florencia REY-BURUSCO\*, Mads GABRIELSEN†, Gisela R. FRANCHINI\*, Alan RIBOLDI-TUNNICLIFFE‡, Andrew J. ROE†, Kate GRIFFITHS§, Alan COOPER||, Betina CÓRSICO\*, Malcolm W. KENNEDY§¶<sup>1</sup> Brian O. SMITH¶<sup>1</sup>

\*Instituto de Investigaciones Bioquímicas de La Plata, CONICET-UNLP, Facultad de Ciencias Médicas, calles 60 y 120, 1900-La Plata, Argentina, †Institute of Infection, Immunity and Inflammation, University of Glasgow, ‡Australian Synchrotron, Clayton, Victoria, Australia, §Institute of Biodiversity, Animal Health and Comparative Medicine, University of Glasgow G12 8QQ, UK, ||School of Chemistry, University of Glasgow, Glasgow G12 8QQ, UK, ¶Institute of Molecular, Cell & Systems Biology, University of Glasgow G12 8QQ, UK

### **Supplementary material**

**Table S1.** <sup>1</sup>H chemical shift coordinates and resonance assignments for the intermolecular NOEs observed between As-p18 and bound oleate

**Table S2.** Chemical shift assignments for oleic acid bound to As-p18

**Figure S1.** As-p18 <sup>15</sup>N relaxation parameters.

**Figure S2.** Amide proton hydrogen-deuterium exchange in oleate-bound As-p18 monitored by NMR spectroscopy.

**Figure S3.** Identification of As-p18's co-purifying ligand by GC-MS.

**Figure S4.** Overlaid <sup>15</sup>N HSQC NMR spectra of As-p18 with and without oleate.

**Figure S5.** Histogram of the chemical shift perturbations induced in the backbone amides of As-p18 by oleate binding.

**Figure S6.** Positions of amino acids in As-p18 that undergo the greatest chemical shift perturbations between *apo* and *holo* forms.

**Figure S7.** Intermolecular NOEs observed in samples of unlabelled As-p18 loaded with [U-<sup>13</sup>C] or alternately labelled sodium oleate.

**Figure S8.** Electron density in the ligand binding pocket of As-p18.

**Abbreviations** (or in full first mention in text)

CSP, NOE, OLA, HSQC, FAME (already given in text),

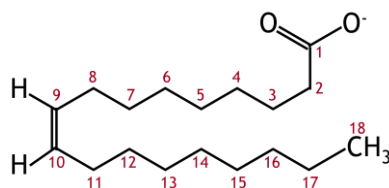

| As-p18                   |                             | OLA              |                             |
|--------------------------|-----------------------------|------------------|-----------------------------|
| Residue and Atom         | $\delta$ $^1\text{H}$ (ppm) | Residue and Atom | $\delta$ $^1\text{H}$ (ppm) |
| 36 Ile H $_{\delta 1}$ * | -0.03                       | 1001 H9          | 5.167                       |
| 36 Ile H $_{\alpha}$     | 3.43                        | 1001 H9          | 5.167                       |
| 36 Ile H $_{\gamma 2}$ * | 0.83                        | 1001 H9          | 5.167                       |
| 32 Met H $_{\epsilon}$ * | 2.00                        | 1001 H10         | 5.167                       |
| 36 Ile H $_{\delta 1}$ * | -0.03                       | 1001 H10         | 5.167                       |
| 32 Met H $_{\epsilon}$ * | 2.00                        | 1001 H12 $_1$    | 1.152                       |
| 84 Asp H $_{\alpha}$     | 4.22                        | 1001 H12 $_2$    | 1.235                       |
| 36 Ile H $_{\delta 1}$ * | -0.03                       | 1001 H16 $_2$    | 1.108                       |
| 28 Tyr H $_{\epsilon}$ * | 6.49                        | 1001 H18*        | 0.832                       |
| 19 Phe H $_{\epsilon}$ * | 6.94                        | 1001 H18*        | 0.832                       |
| 36 Ile H $_{\alpha}$     | 3.43                        | 1001 H18*        | 0.832                       |
| 23 Leu H $_{\alpha}$     | 3.58                        | 1001 H18*        | 0.832                       |
| 36 Ile H $_{\delta 1}$ * | -0.03                       | 1001 H18*        | 0.832                       |
| 23 Leu H $_{\delta 1}$ * | 0.44                        | 1001 H18*        | 0.832                       |
| 19 Phe H $_{\zeta}$      | 6.72                        | 1001 H18*        | 0.832                       |
| 23 Leu H $_{\delta 2}$ * | 0.14                        | 1001 H18*        | 0.832                       |

**Table S1.**  $^1\text{H}$  chemical shift coordinates and resonance assignments for the intermolecular NOEs observed between As-p18 and bound oleate that could be assigned unambiguously.

| C1 | C2    | C3    | C4    | C5 | C6    | C7    | C8    | C9   |
|----|-------|-------|-------|----|-------|-------|-------|------|
| -  | 41.01 | 30.33 | 32.78 | -  | 32.75 | 32.72 | 29.35 | -    |
|    | H2    | H3    | H4    | H5 | H6    | H7    | H8    | H9   |
|    | 1.84  | 1.39  | 1.20  | -  | 1.20  | 1.21  | 1.81  | 5.17 |
|    | 1.84  | 1.39  | 1.20  | -  | 1.20  | 1.34  | 1.81  |      |

  

| C10    | C11   | C12   | C13   | C14   | C15   | C16   | C17   | C18   |
|--------|-------|-------|-------|-------|-------|-------|-------|-------|
| 133.52 | 28.86 | 31.26 | 30.96 | 31.73 | 32.45 | 34.28 | 25.44 | 17.36 |
| H10    | H11   | H12   | H13   | H14   | H15   | H16   | H17   | H18*  |
| 5.17   | 1.84  | 1.15  | 0.92  | 1.01  | 1.21  | 1.04  | 1.19  | 0.83  |
|        | 1.84  | 1.24  | 1.01  | 1.01  | 1.21  | 1.11  | 1.24  |       |

**Table S2.** Chemical shift assignments for oleic acid bound to As-p18

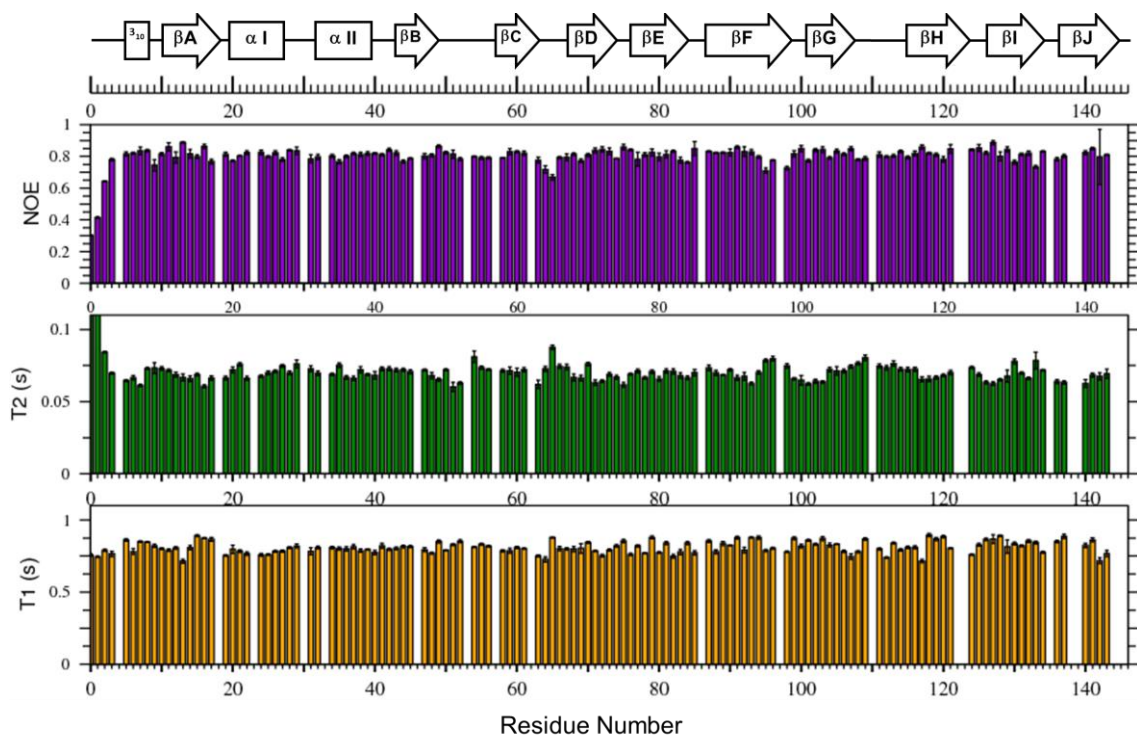

**Figure S1.**  $^{15}\text{N}$  relaxation parameters for As-p18 recorded at 298 K and 14.1 T (60.8 MHz for  $^{15}\text{N}$ ).  $T_1$ ,  $T_2$  and heteronuclear NOE ( $I_{\text{sat}}/I_{\text{ref}}$ ) values are plotted with their error estimates for each well resolved HSQC crosspeak. The locations of regular secondary structure elements are indicated by the cartoon above. Slight dips in heteronuclear NOE values are seen for the  $\beta\text{C}$  to  $\beta\text{D}$  and  $\beta\text{F}$  to  $\beta\text{G}$  loops, accompanied by a few residues with longer  $T_2$  values in the middle of each loop. The  $T_1$  values remain relatively constant throughout. This picture is consistent with increased, fast timescale dynamics for the loops.

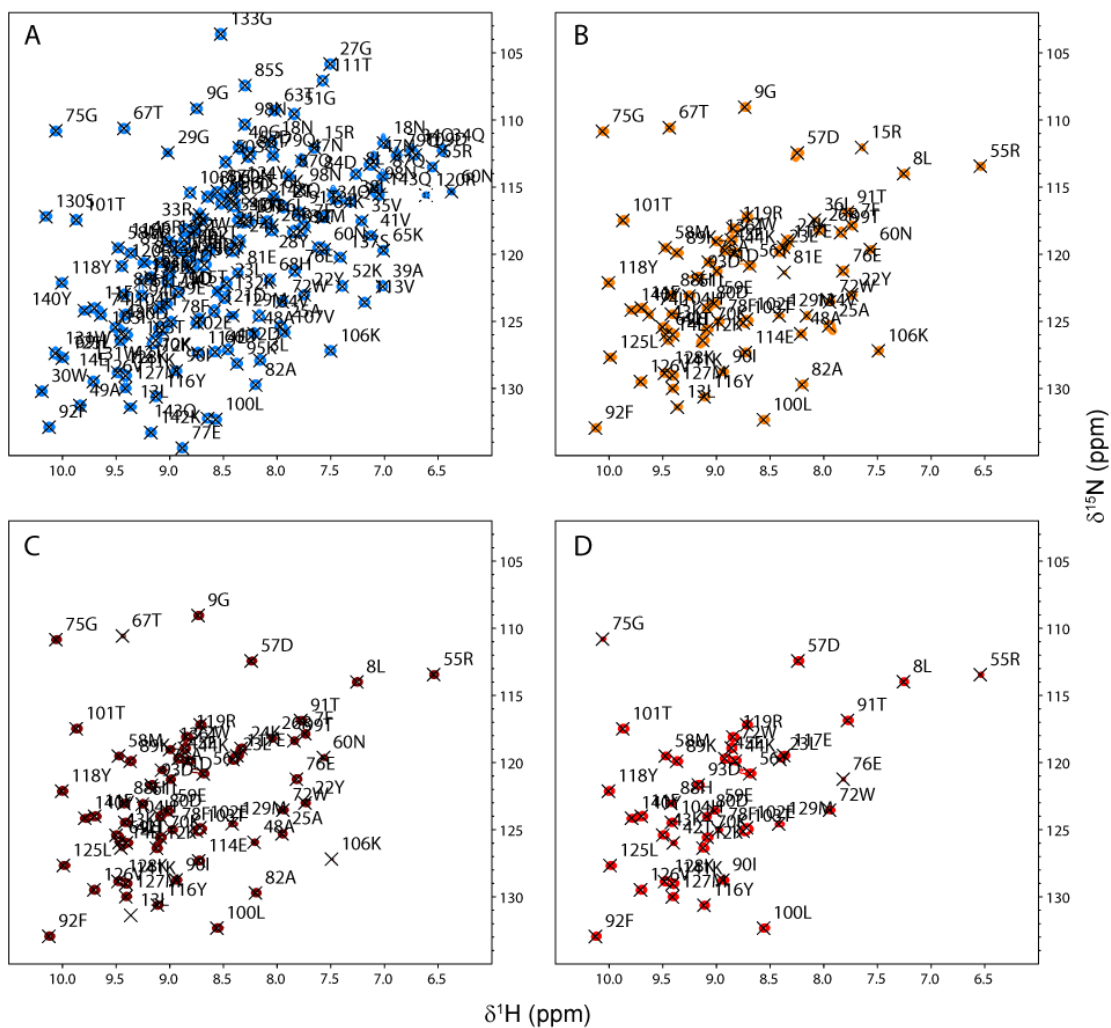

**Figure S2.** Amide proton hydrogen-deuterium exchange in oleate-bound As-p18 monitored by NMR spectroscopy.  $^{15}\text{N}$  HSQCs recorded (A) before lyophilisation and (B-D) starting approximately 10 minutes, 18 minutes and 20 hours after resuspension in  $\text{D}_2\text{O}$ .

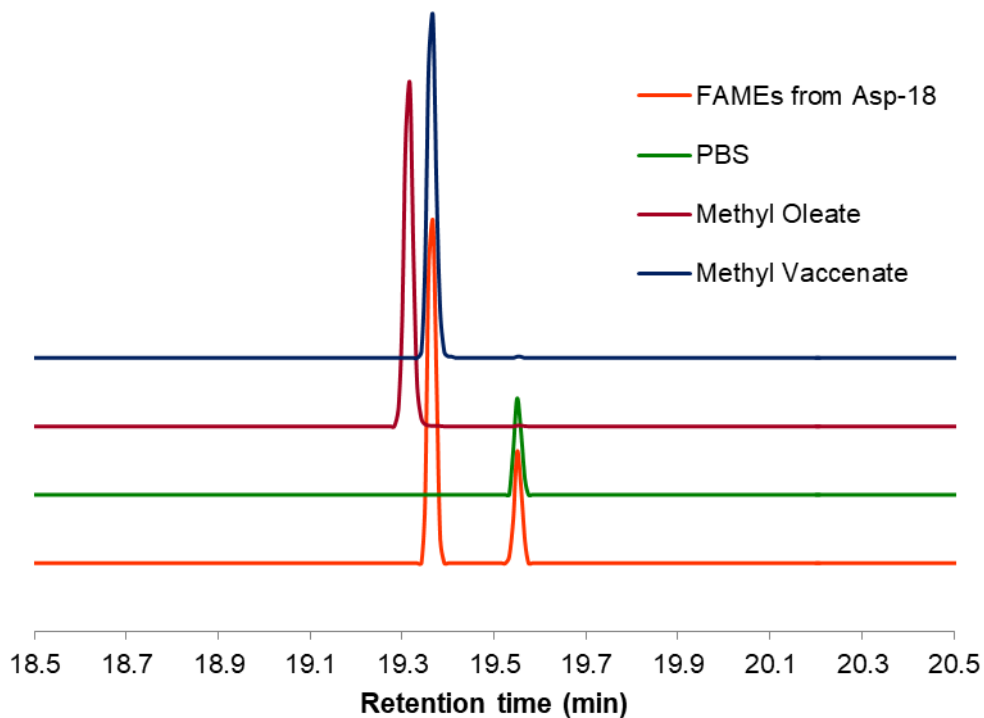

**Figure S3.** Identification of As-p18's co-purifying ligand by GC-MS. Overlay of GC-MS chromatograms of fatty acid methyl esters (FAMES) prepared from As-p18 extract, from phosphate buffered saline solution (PBS) subjected to the same extraction and derivatization protocol, and FAMES prepared from oleate and vaccenate as standards. FAMES were injected onto a DB-35ms GC column (Agilent J&W) at 250 °C and then separated with helium as the mobile phase. The column was maintained at 50 °C for 1 minute after injection and then eluted by a temperature gradient to 300 °C at a rate of 10 °C min<sup>-1</sup>.

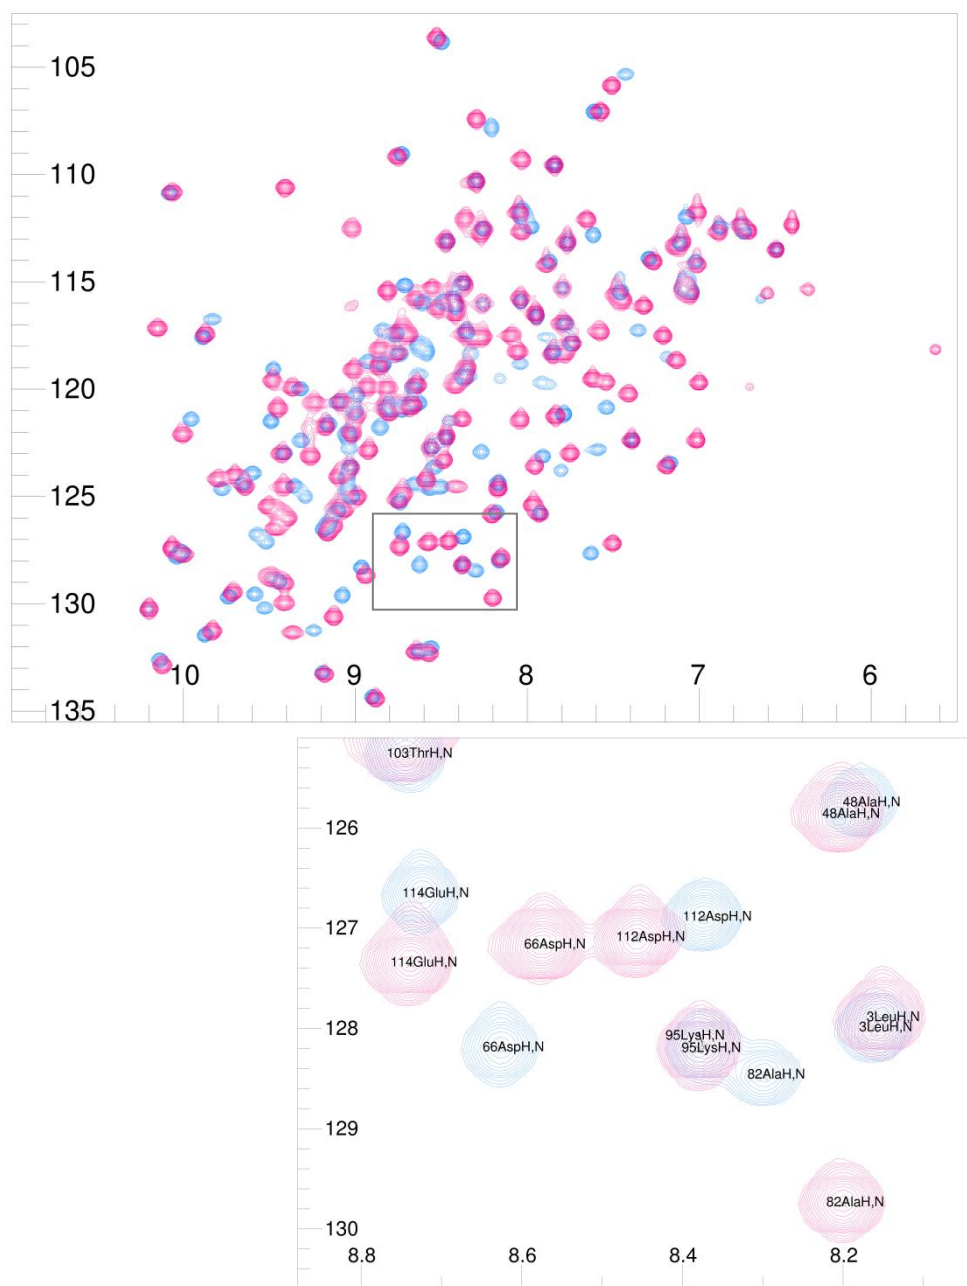

**Figure S4.** A. Overlaid  $^{15}\text{N}$  HSQC NMR spectra of As-p18 protein with (blue) and without (pink) oleate. The with oleate sample was prepared with a protein:ligand ratio of 1:1.5. B. Inset showing chemical shift changes at selected amino acid positions affected by the presence of ligand.

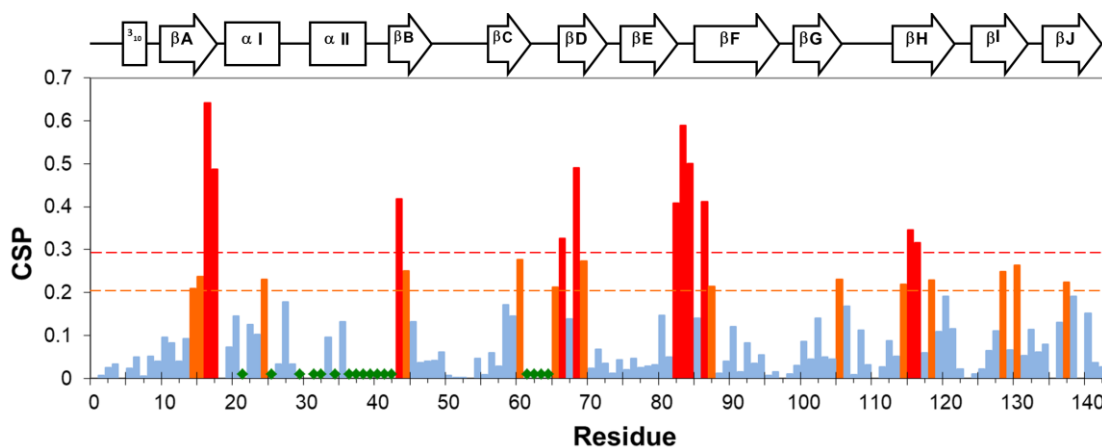

**Figure S5.** Histogram of the chemical shift perturbations ( $CSP = [(\Delta\delta^1H)^2 + (0.2 \times \Delta\delta^{15}N)^2]^{1/2}$ ) induced in the backbone amides of As-p18 by oleate binding. Red and orange dotted lines indicate the two thresholds (average CSP plus two or one standard deviation respectively). Green diamonds are displayed for each of the residues whose peaks are not observed in the *apo* form. The locations of regular secondary structure elements are indicated by the cartoon above the graph.

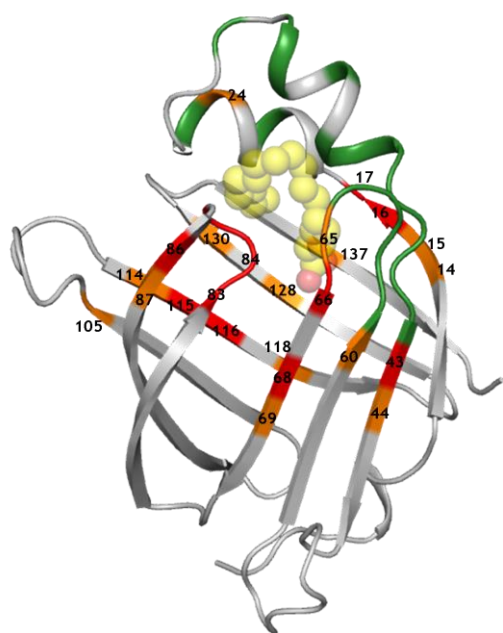

**Figure S6.** Positions of amino acids in As-p18 that undergo the greatest chemical shift perturbations (CSPs) between *apo* and *holo* forms. As-p18 is shown as a backbone cartoon with residues that experience CSPs greater than 1 or 2  $\sigma$  coloured orange and red respectively. Residues 21, 25, 29, 31, 32, 34, 36-42 & 61-64, whose amides are only visible in the holo form are shown in green. Oleic acid is depicted as yellow (carbon) and red (oxygen) spheres.



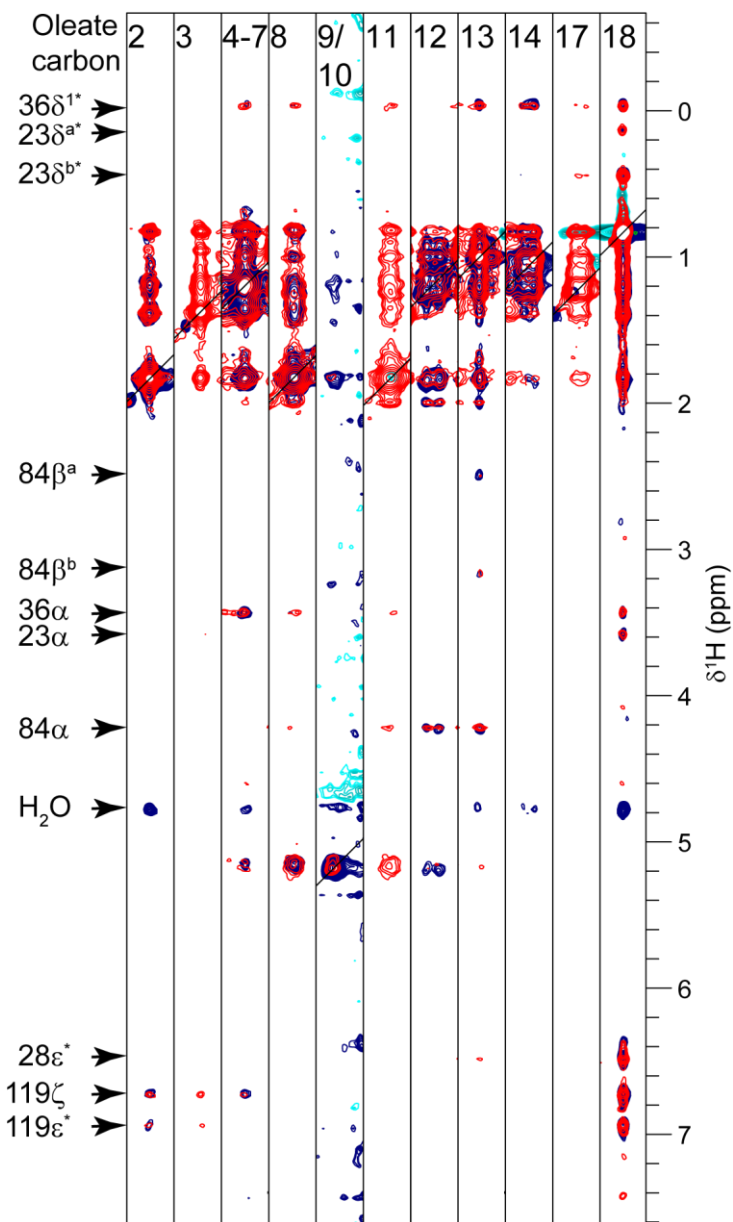

Figure S7. Intermolecular NOEs observed in samples of unlabelled As-p18 loaded with (U- $^{13}\text{C}$ -)oleate (red) or (2,4,6,8,10,12,14,18- $^{13}\text{C}$ -)oleate (dark blue/cyan). The strips shown are extracted from 3D,  $^{13}\text{C}$ -edited NOESY spectra of each complex. Each strip is centred on the  $^{13}\text{C}$  chemical shift of the indicated oleate carbon (or carbons) in the axis perpendicular to the page, and on the  $^1\text{H}$  shift(s) of its (or their) attached hydrogen atoms in the horizontal axis. Correlated As-p18 resonances are indicated at the left hand side with the most likely assignment shown.

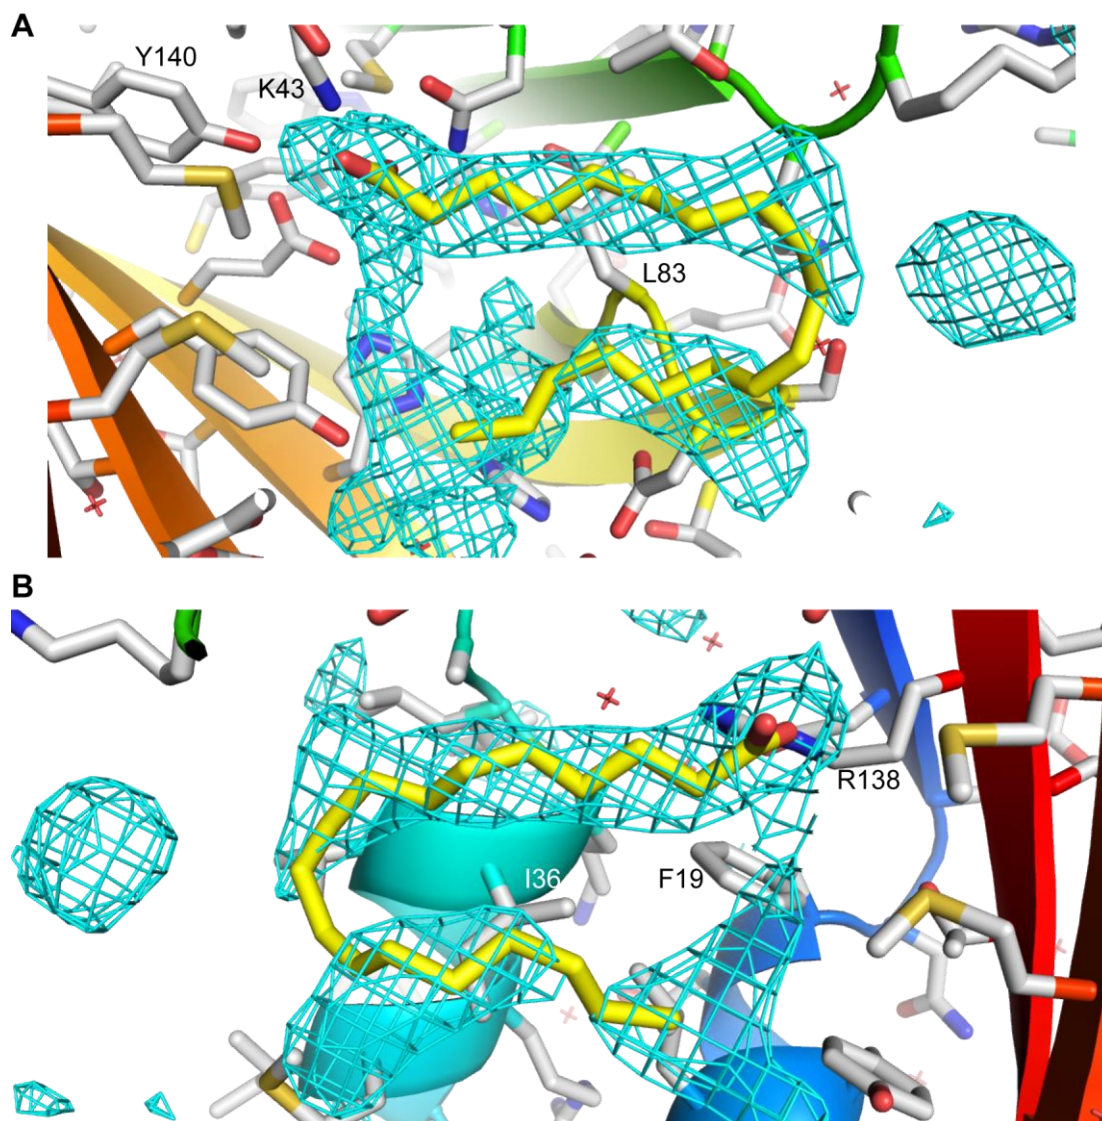

Figure S8. Electron density in the ligand binding site of unstripped As-p18. The polder OMIT map for one copy of As-p18 in the asymmetric unit is shown countoured at  $3\sigma$  (blue mesh) with the protein shown as a backbone cartoon coloured from blue (N-terminal) to red (C-terminal) and with its sidechains shown as sticks with non-C $\alpha$  atoms coloured by atom type (oxygen: red; nitrogen: blue; carbon: grey). Vaccenic acid is shown in yellow sticks with oxygen atoms coloured red. Selected residues that may close contact with the vaccenic acid are labelled. Views A and B are related by a  $180^\circ$  rotation about a vertical axis and the z-slice chosen so that protein residues do not obscure the view of the ligand.
